# Supplementary material for: Rapid detection of phycotoxin domoic acid in seawater and seafood based on the developed lateral flow immunoassay
Source: Royal Society of Chemistry journal article supplement (doi:10.1039/d2ay00751g), 2022-01-01
Supplement: d2ay00751g1.pdf [file d2ay00751g1.pdf]

ARTICLE

6 **Rapid detection of phycotoxin domoic acid in seawater and**  
7 **seafood based on the developed lateral flow immunoassay**

8 Olga D. Hendrickson<sup>a</sup>, Elena A. Zvereva<sup>a</sup>, Olga N. Solopova<sup>b</sup>, Nikolay E. Varlamov<sup>b</sup>, Olga B.  
9 Shemchukova<sup>b</sup>, Anatoly V. Zherdev<sup>a</sup>, Peter G. Sveshnikov<sup>c</sup>, and Boris B. Dzantiev<sup>a\*</sup>

1 Received  
2 Accepted

3 DOI:

10

11

4

5

12

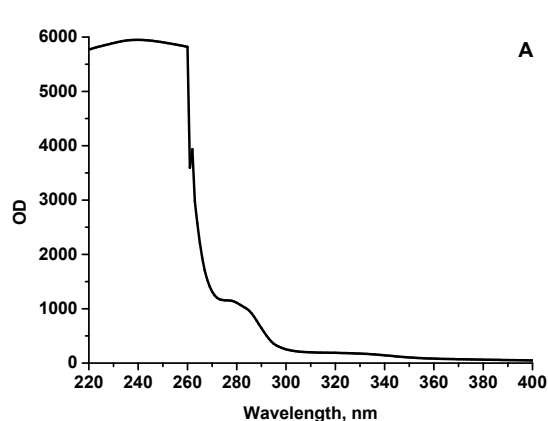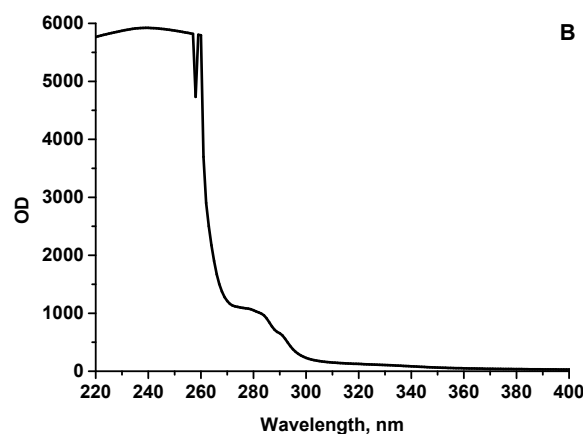

13 Figure 1S. Spectra of DA-BSA (A) and DA-STI (B) conjugates.

22

23

24

25

26

27

28

29

14

15

16

17

18

19

20

21

30

31

32

33

34

35

36

37

<sup>a</sup>Bach Institute of Biochemistry, Research Center of Biotechnology of the Russian Academy of Sciences, Leninsky prospect 33, 119071, Moscow, Russia.

<sup>b</sup>Blokhin National Medical Research Center of Oncology, Ministry of Health of the Russian Federation, Kashirskoye shosse 24, 115478, Moscow, Russia.

<sup>c</sup>Russian Research Center for Molecular Diagnostics and Therapy, Sympheropolsky Blvrd., 8, 117638, Moscow, Russia

\*Corresponding author: dzantiev@inbi.ras.ru, Tel. /Fax: +7 495 9543142

38

39 **Table 1S.** Parameters of the LFIA using different membranes and DA–protein conjugates.

| Working membrane | Signal amplitude at immobilized DA–BSA (RU) | Signal amplitude at immobilized DA–STI (RU) | DA LOD at immobilized DA–BSA (ng/mL) | DA LOD at immobilized DA–STI (ng/mL) | Mab concentration at immobilized DA–BSA (ng/mL) | Mab concentration at immobilized DA–STI (ng/mL) |
|------------------|---------------------------------------------|---------------------------------------------|--------------------------------------|--------------------------------------|-------------------------------------------------|-------------------------------------------------|
| CNPC-CC12        | ~4000                                       | ~2500                                       | 1.4                                  | 1.6                                  | 140                                             | 250                                             |
| Hi-Flow 075      | ~3600                                       | ~1750                                       | 1.9                                  | 2.1                                  | 200                                             | 300                                             |

40

41
